# Supplementary material
Source: HighWire-hosted journal article supplement (https://www.jrheum.org/highwire/filestream/34437/field_highwire_adjunct_files/0/180477DataSuppl.pdf)
Supplement: 180477DataSuppl.pdf [file 180477DataSuppl.pdf]

ONLINE SUPPLEMENTARY MATERIAL

**Supplementary Table 1.**

| <b>Table 1: Independent factors associated with absenteeism 12 months later</b> |                                          |                              |                                |
|---------------------------------------------------------------------------------|------------------------------------------|------------------------------|--------------------------------|
|                                                                                 |                                          | <b>GEE Linear Regression</b> |                                |
| <b>Variables in order of model entry:</b>                                       |                                          | <b>Coefficient</b>           | <b>95% Confidence Interval</b> |
| <b>Presenteeism</b> ( <i>effect per % of presenteeism</i> )                     |                                          | 0.12                         | (0.04, 0.20)                   |
| <b>Profession</b> ( <i>labour intensive vs. sedentary</i> )                     |                                          | 2.30                         | (-0.42, 5.03)                  |
| <b>Peripheral Joint Involvement</b> ( <i>yes vs. no</i> )                       |                                          | 4.31                         | (-0.42, 5.03)                  |
| <b>Adjusting variables:</b>                                                     | <i>Age (year)</i>                        | 0.13                         | (0.005, 0.25)                  |
|                                                                                 | <i>Gender (female vs. male)</i>          | 3.6                          | (0.45, 6.75)                   |
|                                                                                 | <i>Deprivation (increasing quintile)</i> | 0.09                         | (-0.76, 0.94)                  |
|                                                                                 | <i>Baseline absenteeism (%)</i>          | 0.11                         | (-0.04, 0.25)                  |

**Supplementary Table 2.**

| <b>Table 2: Independent factors associated with presenteeism 12 months later</b> |                                          |                              |                                |
|----------------------------------------------------------------------------------|------------------------------------------|------------------------------|--------------------------------|
|                                                                                  |                                          | <b>GEE Linear Regression</b> |                                |
| <b>Variables in order of model entry:</b>                                        |                                          | <b>Coefficient</b>           | <b>95% Confidence Interval</b> |
| <b>BASDAI</b> ( <i>score 0-10</i> )                                              |                                          | 0.76                         | (-0.23, 1.78)                  |
| <b>Chalder fatigue</b> ( <i>score 0-11</i> )                                     |                                          | 0.65                         | (0.12, 1.18)                   |
| <b>Profession</b> ( <i>labour intensive vs. sedentary</i> )                      |                                          | 3.36                         | (0.61, 6.10)                   |
| <b>BASFI</b> ( <i>score 0-10</i> )                                               |                                          | 0.86                         | (-0.03, 1.75)                  |
| <b>Adjusting variables:</b>                                                      | <i>Age (year)</i>                        | -0.001                       | (-0.12, 0.12)                  |
|                                                                                  | <i>Gender (female vs. male)</i>          | 2.52                         | (-0.42, 5.47)                  |
|                                                                                  | <i>Deprivation (increasing quintile)</i> | 0.79                         | (-0.12, 1.70)                  |
|                                                                                  | <i>Baseline presenteeism (%)</i>         | 0.37                         | (0.27, 0.47)                   |

BASDAI – Bath Ankylosing Spondylitis Disease Activity Index, BASFI – Bath Ankylosing Spondylitis Functional Index
